# Supplementary material
Source: PubMed Central journal article supplement (PMC7377064)
Supplement: ao0c01770_si_001.pdf [file ao0c01770_si_001.pdf]

## Supporting Information

### **Rapid fabrication of poly(methyl methacrylate) devices for lab-on-a-chip applications using acetic acid and UV treatment**

Kieu The Loan Trinh,<sup>1</sup> Duc Anh Thai,<sup>2</sup> Woo Ri Chae,<sup>3</sup> Nae Yoon Lee<sup>\*,2</sup>

<sup>1</sup>Department of Industrial Environmental Engineering, Gachon University, 1342 Seongnam-daero, Sujeong-gu, Seongnam-si, Gyeonggi-do, 13120, Korea

<sup>2</sup>Department of BioNano Technology, Gachon University, 1342 Seongnam-daero, Sujeong-gu, Seongnam-si, Gyeonggi-do, 13120, Korea

<sup>3</sup>BioNano Research Institute, Gachon University, 1342 Seongnam-daero, Sujeong-gu, Seongnam-si, Gyeonggi-do, 13120, Korea

\*Corresponding Author: Tel: +82-31-750-8556, Fax: +82-31-750-8774, Email: [nylee@gachon.ac.kr](mailto:nylee@gachon.ac.kr) (N. Y. Lee)

**Table S1.** Comparison of different solvent bonding methods

| Bonding process                                                                                                                                                                                  | Bond strength | Method description                                                                                                                                                                                                                                                                                                                                                                   | Reference |
|--------------------------------------------------------------------------------------------------------------------------------------------------------------------------------------------------|---------------|--------------------------------------------------------------------------------------------------------------------------------------------------------------------------------------------------------------------------------------------------------------------------------------------------------------------------------------------------------------------------------------|-----------|
| <ul style="list-style-type: none"> <li>Acetic acid 50%</li> <li>UV irradiation (30 s)</li> <li>Pressure (using clamp)</li> <li>Total process time: less than 1 min</li> </ul>                    | 11.75 MPa     | Advantages: <ul style="list-style-type: none"> <li>Rapid and straightforward</li> <li>Low cost</li> <li>Non-toxic</li> <li>High bond strength</li> <li>Deformation-free and clogging-free</li> <li>Applicable for mass-production</li> </ul> Disadvantages: <ul style="list-style-type: none"> <li>Requirement of well-ventilated facility to eliminate acetic acid smell</li> </ul> | This work |
| <ul style="list-style-type: none"> <li>Ethanol 95%</li> <li>Spin-coating and UV irradiation</li> <li>Total process time: around 3 min</li> </ul>                                                 | >1 MPa        | Advantages: <ul style="list-style-type: none"> <li>Simple and quick</li> <li>Low temperature</li> </ul> Disadvantages: <ul style="list-style-type: none"> <li>Surface roughness affects the bonding efficiency</li> <li>Solvent is flammable</li> </ul>                                                                                                                              | [1]       |
| <ul style="list-style-type: none"> <li>1,2-dichloroethane and ethanol (2:8)</li> <li>Room temperature</li> <li>Pressure (0.1 MPa)</li> <li>Total process time: around 7 min</li> </ul>           | 3.8 MPa       | Advantages: <ul style="list-style-type: none"> <li>Straightforward and simple</li> <li>Low temperature</li> </ul> Disadvantages: <ul style="list-style-type: none"> <li>Solvent is highly flammable and volatile</li> <li>Requirement of pressure machine</li> </ul>                                                                                                                 | [2]       |
| <ul style="list-style-type: none"> <li>Chloroform and ethanol</li> <li>Heat at 40°C for 10 min</li> <li>Pressure (using quartz glass fixture)</li> <li>Total process time: around 1 h</li> </ul> | 2.675 MPa     | Advantages: <ul style="list-style-type: none"> <li>Straightforward and simple</li> <li>Low pressure application</li> </ul> Disadvantages: <ul style="list-style-type: none"> <li>Chloroform is toxic</li> <li>Time-consuming</li> </ul>                                                                                                                                              | [3]       |
| <ul style="list-style-type: none"> <li>Acetonitrile</li> <li>Solvent exposure for 8 min</li> <li>Pressure (0.5 MPa)</li> <li>Total process time: around 15 min</li> </ul>                        | Not mentioned | Advantages: <ul style="list-style-type: none"> <li>Simple and versatile</li> <li>Low cost</li> </ul> Disadvantages: <ul style="list-style-type: none"> <li>Solvent is toxic and flammable</li> <li>Requirement of pressure machine</li> </ul>                                                                                                                                        | [4]       |
| <ul style="list-style-type: none"> <li>Isopropanol 100%</li> <li>Ultrasonic (8 s)</li> <li>Pressure (0.32 MPa)</li> <li>Total process time: less than 2 min</li> </ul>                           | 2.25 MPa      | Advantages: <ul style="list-style-type: none"> <li>Quick</li> <li>Low temperature</li> </ul> Disadvantages: <ul style="list-style-type: none"> <li>Solvent is highly flammable and volatile</li> <li>Requirement of pressure machine</li> </ul>                                                                                                                                      | [5]       |

**References:**

- (1) Chen, P. C.; Duong, L. H. Novel solvent bonding method for thermoplastic microfluidic chips. *Sens. Actuator B-Chem.* **2016**, 237, 556-562.
- (2) Lin, C. H.; Chao, C. H.; Lan, C. W. Low azeotropic solvent for bonding of PMMA microfluidic devices. *Sens. Actuator B-Chem.* **2007**, 121(2), 698-705.
- (3) Zhang, H.; Liu, X.; Li, T.; Han, X. Miscible organic solvents soak bonding method use in a PMMA multilayer microfluidic device. *Micromachines* **2014**, 5, 1416-1428.
- (4) Sun, X.; Peeni, B. A.; Yang, W.; Becerril, H. A.; Woolley, A. T. Rapid prototyping of poly(methyl methacrylate) microfluidic systems using solvent imprinting and bonding. *J. Chromatogr. A* **2007**, 1162, 162-166.
- (5) Zhang, Z.; Luo, Y.; Wang, X.; Zheng, Y.; Zhang, Y.; Wang, L. A low temperature ultrasonic bonding method for PMMA microfluidic chips. *Microsyst. Technol.* **2010**, 16, 533-541.

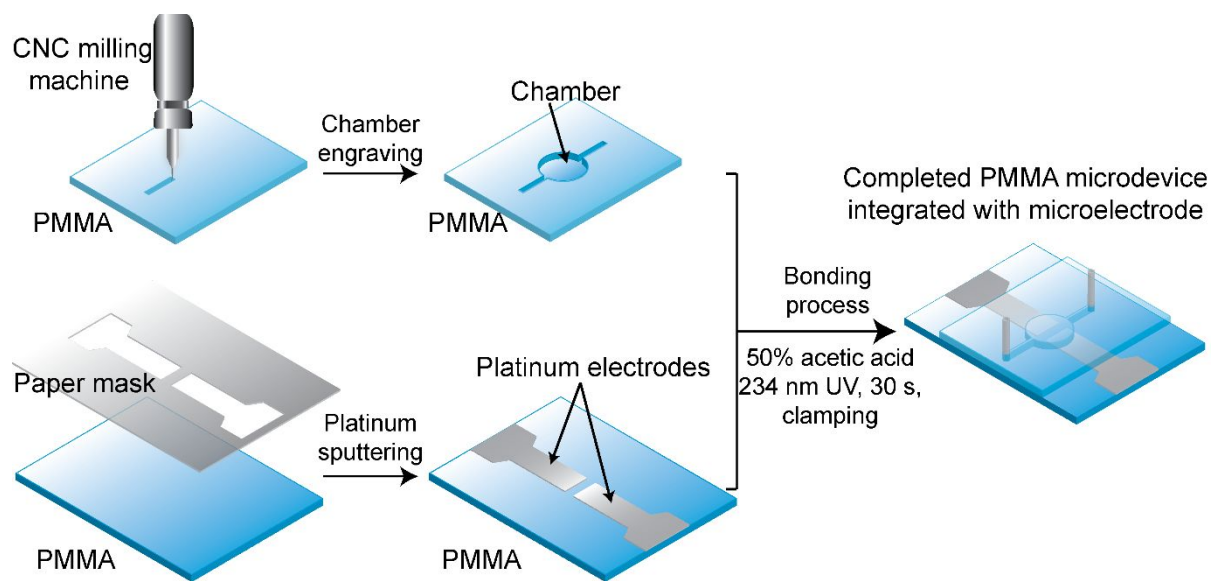

**Figure S1.** The overall schematic illustration of the fabrication of PMMA microdevice integrated with microelectrodes.
